# Supplementary material for: Standardization of microwave-assisted extraction procedures for characterizing non-labile metallic nanoparticles in environmental solid samples by means of single particle ICP-MS
Source: Royal Society of Chemistry journal article supplement (doi:10.1039/d4ja00123k), 2024-01-01
Supplement: d4ja00123k1.pdf [file d4ja00123k1.pdf]

## Standardization of microwave-assisted extraction procedures for characterizing metallic nanoparticles in environmental solid samples by means single particle ICP-MS.

Carlos Gómez-Pertusa, M. Carmen García-Poyo, Guillermo Grindlay,  
Ricardo Pedraza, Adela Yañez, Luis Gras

**Table S1.** Particle number recovery and average size of PtNPs obtained in soil samples after an extraction treatment by using the SMO and DMO. Power 800W; NaOH concentration 0.1 M; extraction time 6min. Results are expressed as the mean value $\pm$ s, n=5.

|           | Particle size/ nm | Recovery/ %     |               |
|-----------|-------------------|-----------------|---------------|
|           |                   | SMO             | DMO           |
| Reference | 69 $\pm$ 2        | -               | -             |
| Acid      | 69.1 $\pm$ 0.6    | 25 $\pm$ 5      | 92 $\pm$ 5    |
| Sandy     | 68.7 $\pm$ 0.8    | 19 $\pm$ 8      | 95 $\pm$ 5    |
| SL36      | 69.3 $\pm$ 0.7    | 19 $\pm$ 10     | 75 $\pm$ 4    |
| Alkaline  | 68.8 $\pm$ 1.3    | 15 $\pm$ 3      | 78 $\pm$ 6    |
| ERM CC141 | 68.2 $\pm$ 1.1    | 15 $\pm$ 3      | 76 $\pm$ 12   |
| ERM 483   | 69.1 $\pm$ 0.9    | 7.6 $\pm$ 1.3   | 73 $\pm$ 4    |
| Clayey    | 68.3 $\pm$ 0.8    | 0.31 $\pm$ 0.12 | 9.9 $\pm$ 1.9 |

**Table S2.** Platinum particle number recovery response in sandy soil for CCD design. Results are expressed as the mean value $\pm$ s, n=3.

|   | <b>Concentration/ M</b> | <b>MW time/ min</b> | <b>Recovery/ %</b> |
|---|-------------------------|---------------------|--------------------|
| 1 | 0.01                    | 2.5                 | 9.2 $\pm$ 0.7      |
| 2 | 0.1                     | 1                   | 25 $\pm$ 5         |
| 3 | 0.5                     | 2.5                 | 28 $\pm$ 4         |
| 4 | 0                       | 7.5                 | 39 $\pm$ 9         |
| 5 | 0.1                     | 7.5                 | 78 $\pm$ 4         |
| 6 | 1                       | 7.5                 | 44 $\pm$ 2         |
| 7 | 0.01                    | 15                  | 49 $\pm$ 10        |
| 8 | 0.1                     | 20                  | 61 $\pm$ 6         |
| 9 | 0.5                     | 15                  | 22 $\pm$ 2         |

**Table S3.** Platinum particle number recovery response in air filters for CCD design. Results are expressed as the mean value $\pm$ s, n=3.

|   | <b>Concentration/ M</b> | <b>MW time/ min</b> | <b>Recovery/ %</b> |
|---|-------------------------|---------------------|--------------------|
| 1 | 0                       | 1                   | 14 $\pm$ 2         |
| 2 | 0.05                    | 2                   | 27 $\pm$ 3         |
| 3 | 0.1                     | 2                   | 34 $\pm$ 4         |
| 4 | 0.01                    | 3                   | 15 $\pm$ 2         |
| 5 | 0.05                    | 3                   | 42 $\pm$ 7         |
| 6 | 0.1                     | 3                   | 50 $\pm$ 9         |
| 7 | 0.01                    | 4                   | 25 $\pm$ 6         |
| 8 | 0.05                    | 4                   | 55 $\pm$ 9         |
| 9 | 0.5                     | 5                   | 77 $\pm$ 8         |

**Table S4.** PtNPs particle number and average size distributions obtained after the SMO treatment with and without centrifugation. Results are expressed as the mean value $\pm$ s, n=3. Reference value obtained by TEM, 69 $\pm$ 2nm.

|                   | <b>Size/ nm</b> | <b>Particle number/ NPs mL<sup>-1</sup></b> |
|-------------------|-----------------|---------------------------------------------|
| No centrifugation | 68.6 $\pm$ 0.7  | 1.34 $\pm$ 0.08 $\cdot$ 10 <sup>4</sup>     |
| Centrifugation    | 69.1 $\pm$ 0.9  | 1.32 $\pm$ 0.06 $\cdot$ 10 <sup>4</sup>     |

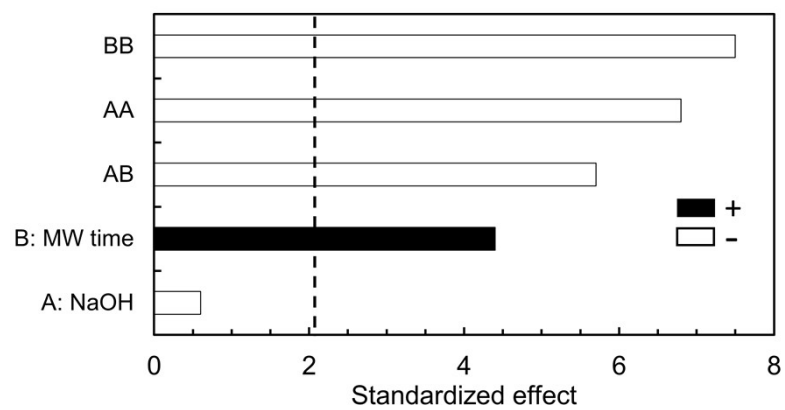

**Figure S1.** Pareto chart obtained in the optimization study of the main variables affecting PtNPs MW-extraction in sandy soil. Dashed line indicates Pareto chart threshold.

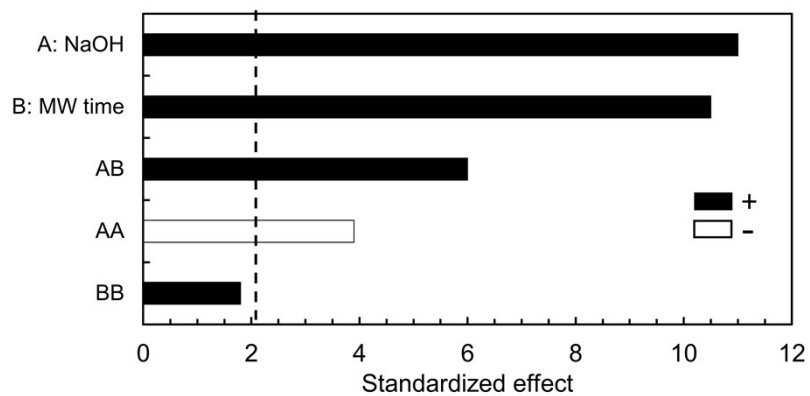

**Figure S2.** Pareto chart obtained in the optimization study of the main variables affecting PtNPs MW-extraction in air filters. Dashed line indicates Pareto chart threshold.

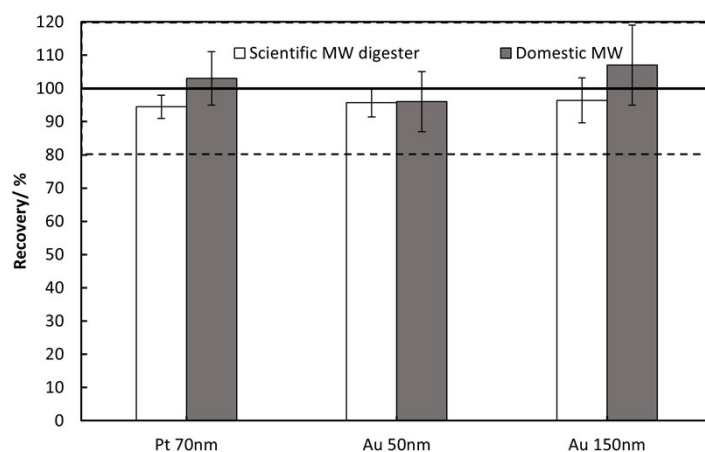

**Figure S3.** Platinum and AuNPs recoveries in air filters operating DMO and SMO devices. a) 70nm PtNPs, b) 50nm AuNPs and c) 150nm AuNPs. Error bars: standard deviation, n=5. Dashed lines limit the quantitative recovery interval.

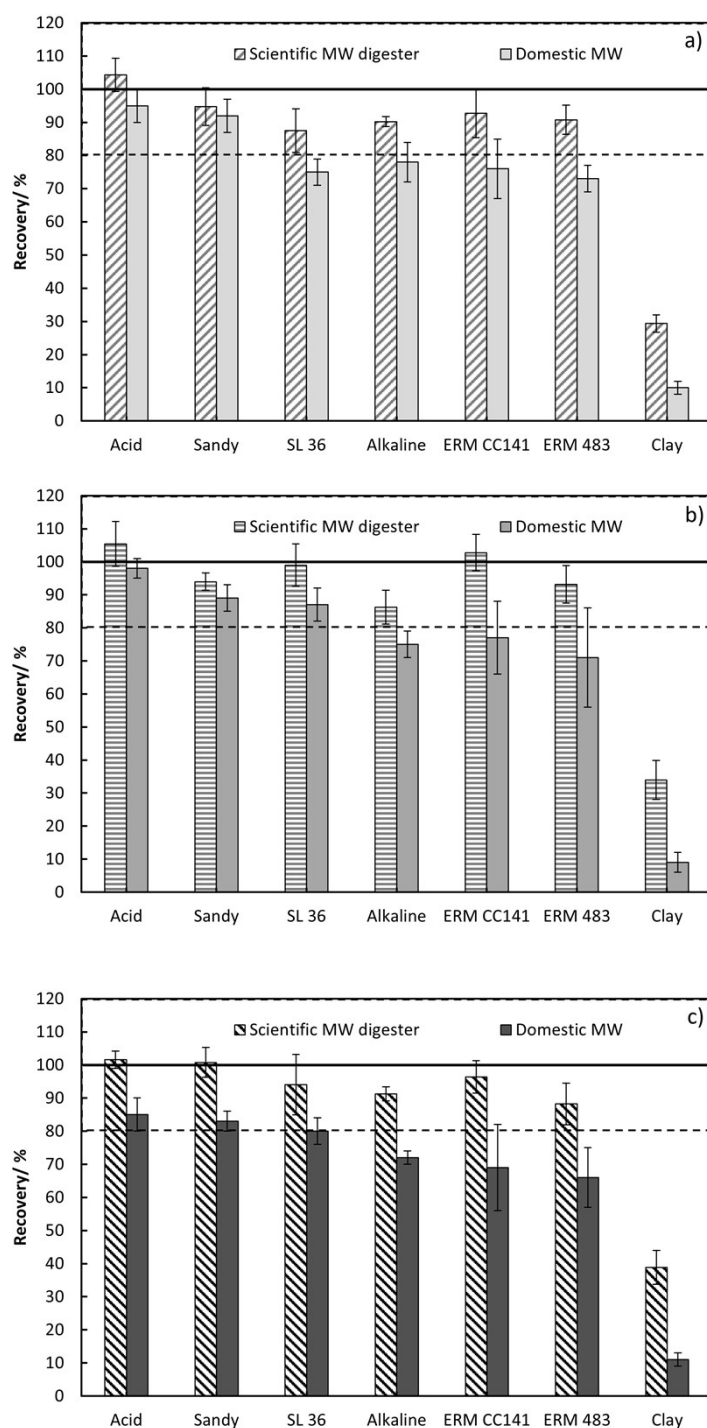

**Figure S4.** Platinum particle recovery in soils operating DMO and SMO devices.

a) 70nm PtNPs, b) 50nm AuNPs and c) 150nm AuNPs. Error bars: standard deviation, n=5. Dashed lines limit the quantitative recovery interval.
